# Supplementary material
Source: PubMed Central journal article supplement (PMC8457616)

Supplemental figure 1: Waterfall plot

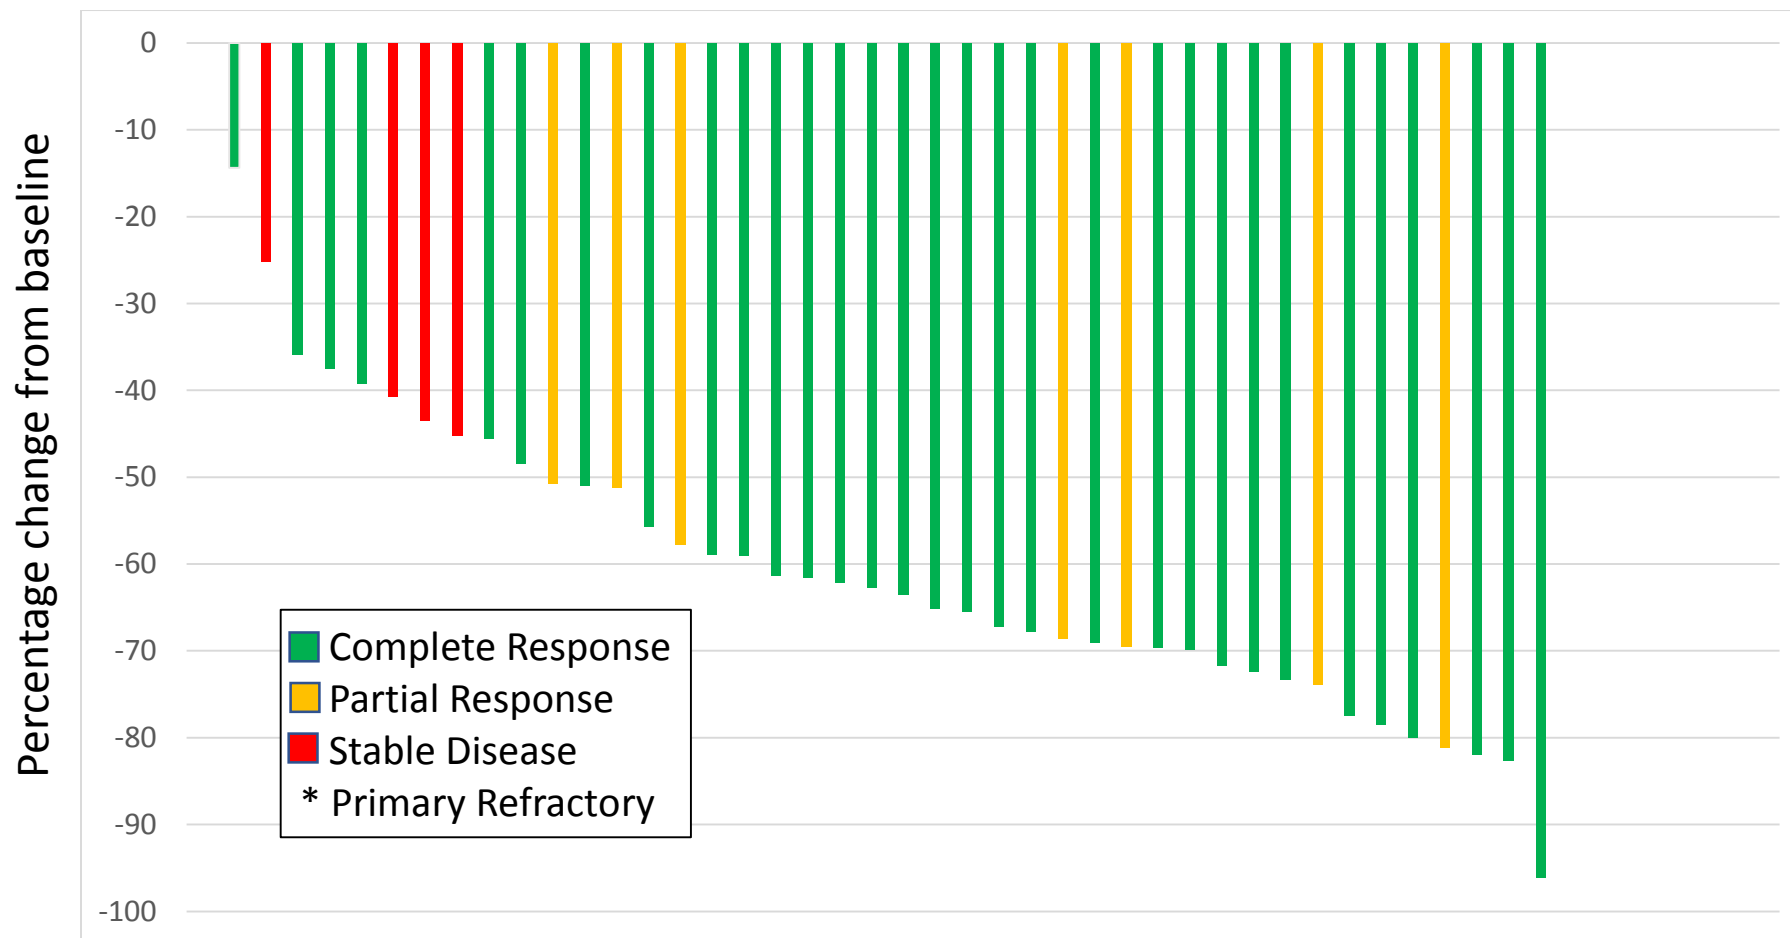

Supplement: NIHMS1730456-supplement-1.pdf [file NIHMS1730456-supplement-1.pdf]
